# Supplementary material for: Corrosion Mechanisms in Early-Song-Dynasty Bluish-White Porcelain from the Nanhai One Shipwreck: Cream and Ash-Green Glazes
Source: Research Square preprint supplement (doi:10.21203/rs.3.rs-8830914/v1), 2026-02-19
Supplement: Supplementary file 1 [file 597b6e3d79fd5f798d979875.pdf]

## Supplementary Figures

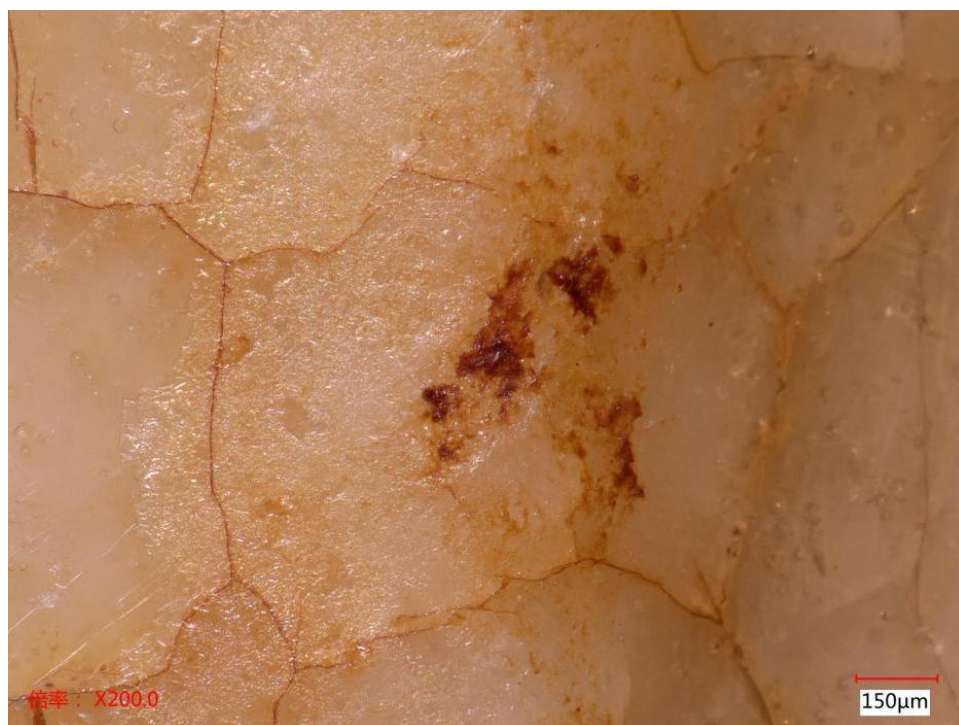

**Supplementary Fig. 1.** OM image of the protrusion on the outer wall of the transparent cream-glazed sample.

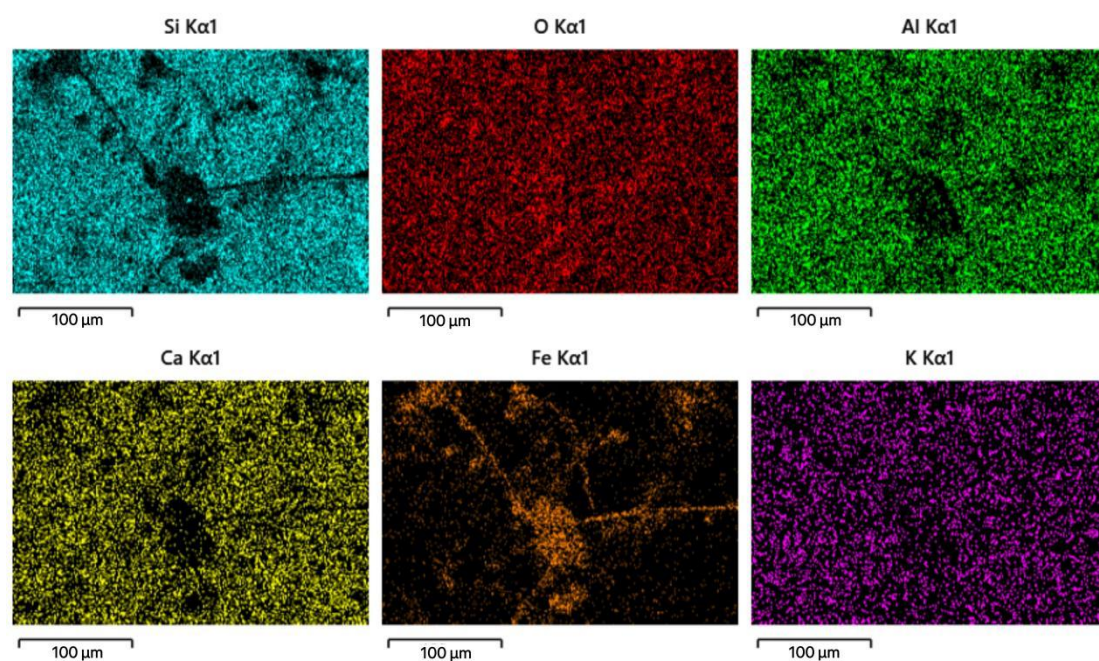

**Supplementary Fig. 2** EDS elemental mapping of the surface of the transparent cream-colored glaze. The area is shown in Fig. 2c.

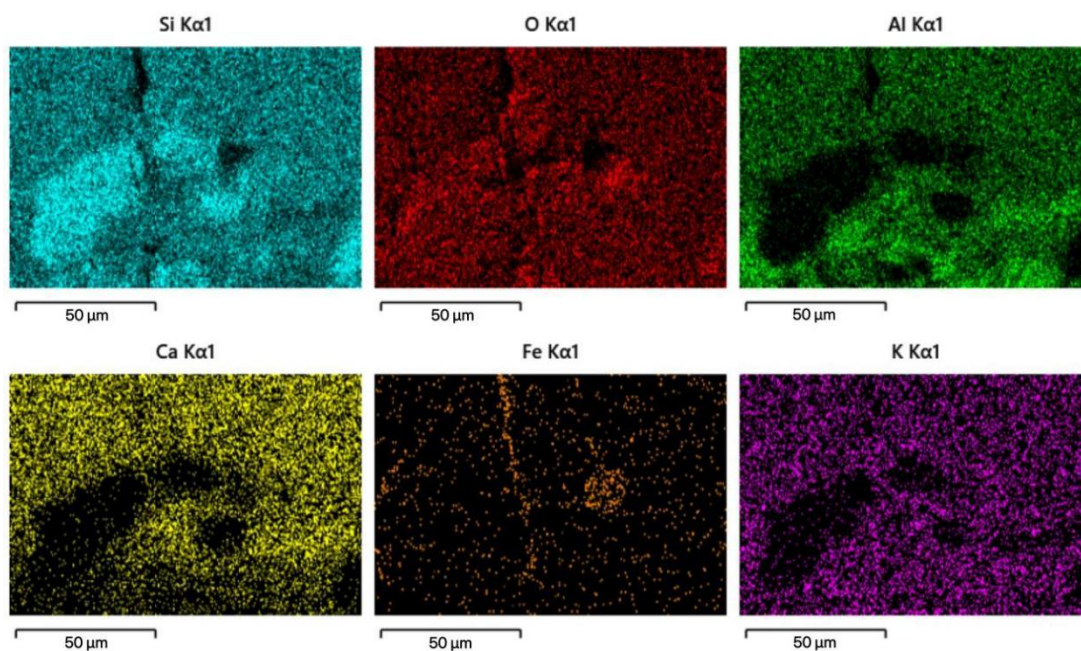

**Supplementary Fig. 3** EDS elemental mapping of the cross-section of the transparent cream-colored glaze. The area is shown in Fig. 3b.

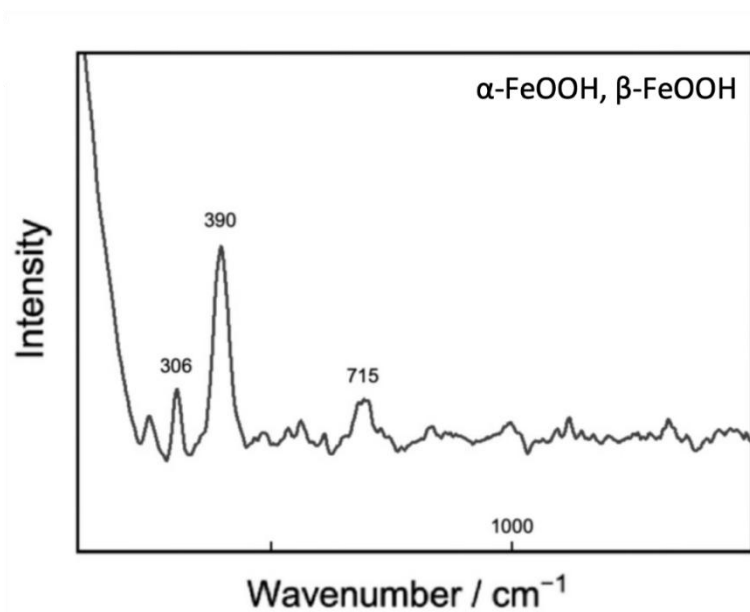

**Supplementary Fig. 4.** Raman spectrum of the brown deposits, identified as goethite (RRUFF ID: R050142;  $\alpha$ -FeOOH), and akaganeite (National Museum of China;  $\beta$ -FeOOH).

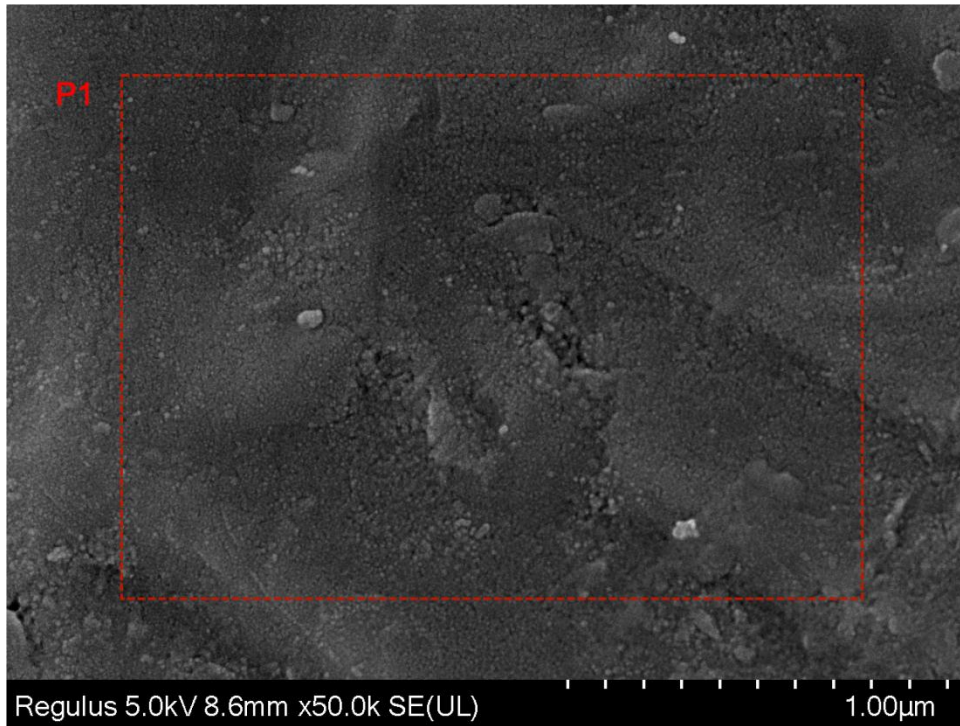

**Supplementary Fig. 5.** SEM image of the localized corrosion layer on the matt ash-green glaze surface in region A is composed of granular aggregates.

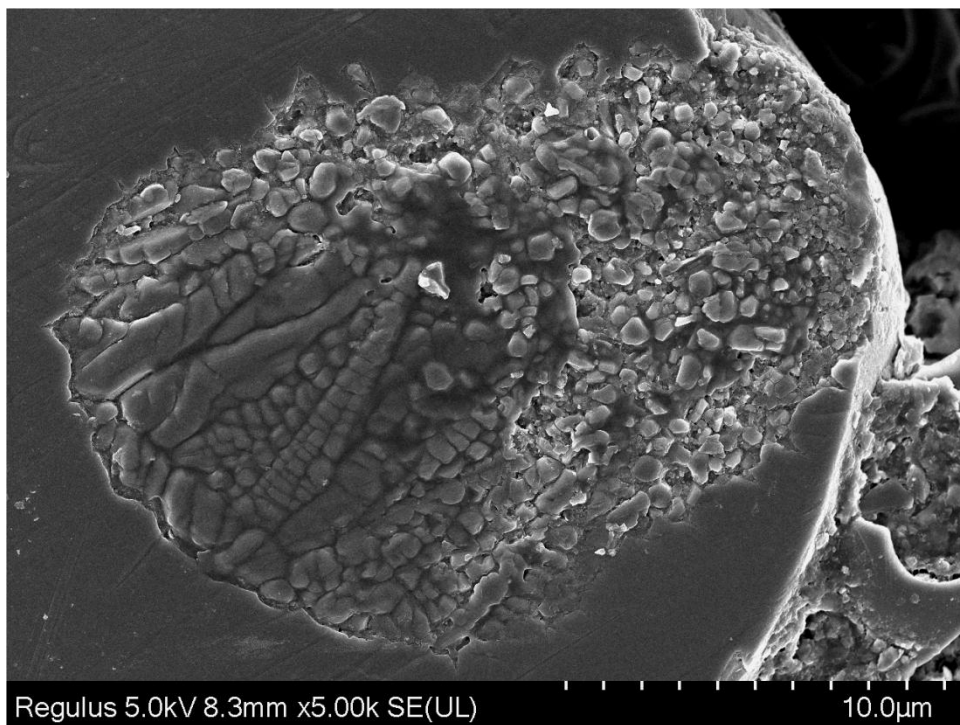

**Supplementary Fig. 6.** SEM image of the internal structure of a quartz sphere surrounded by an arc-shaped crack.

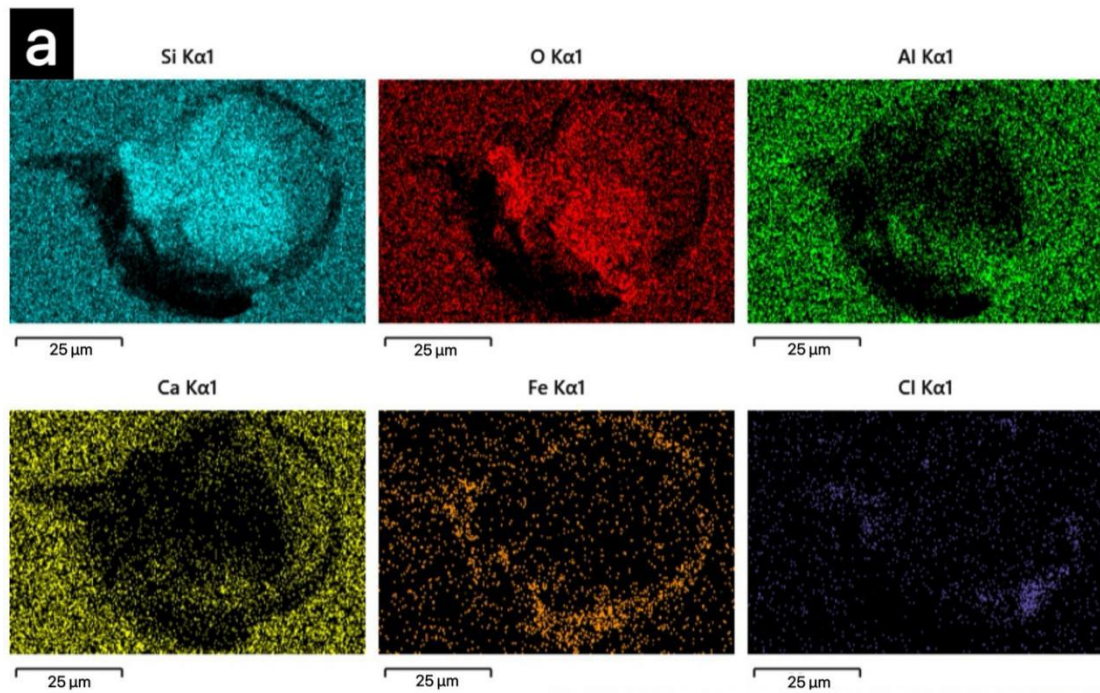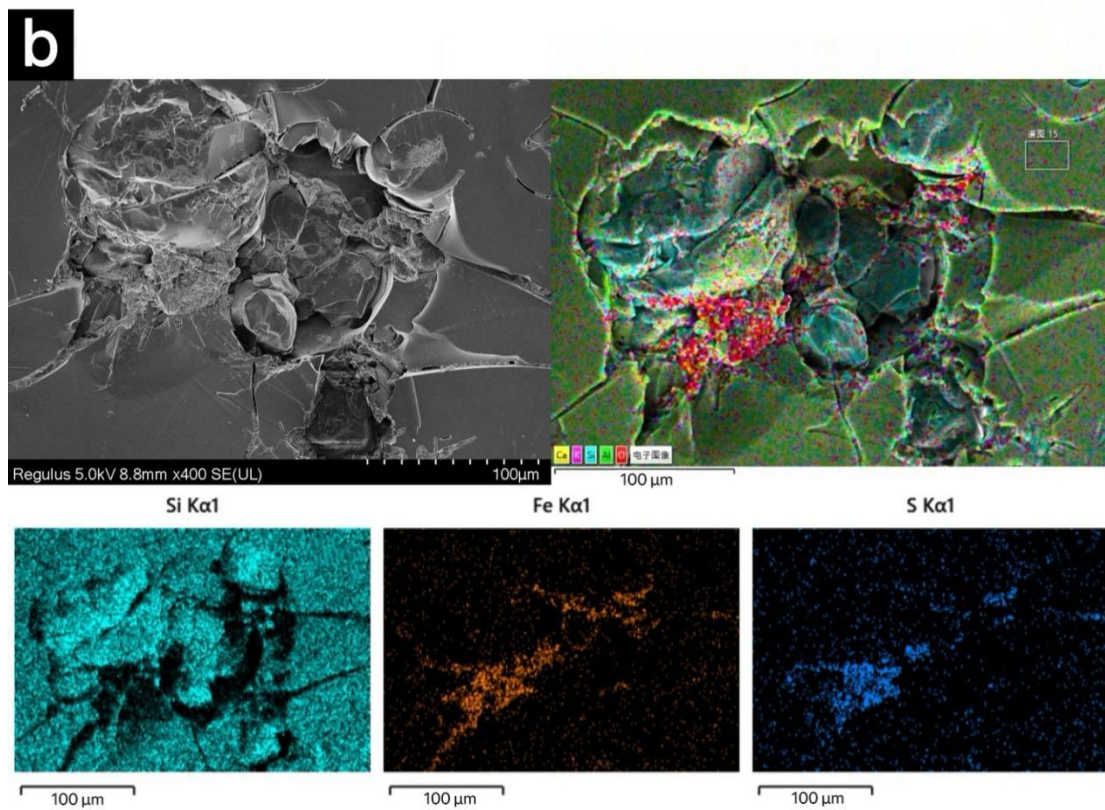

**Supplementary Fig. 7.** EDS elemental mapping of the surface of the matte ash-green glaze. (a) The area is shown in Fig. 4f. (b) Another corrosion pit.

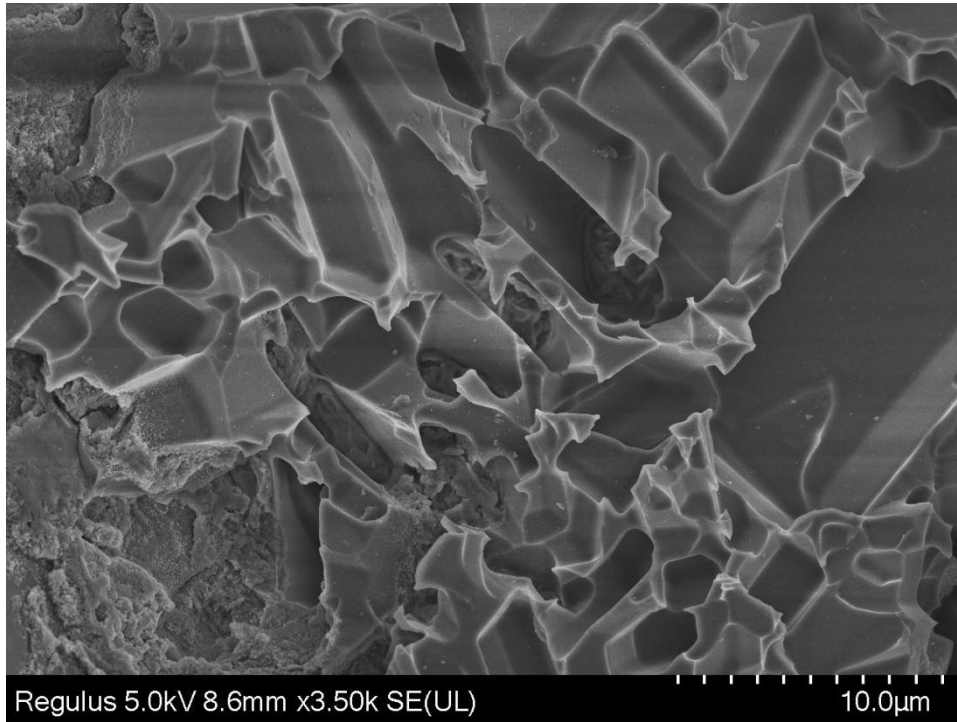

**Supplementary Fig. 8.** SEM image of the enlarged view of the boxed area shown in (4i) displaying columnar pits at the base of the corrosion pit.

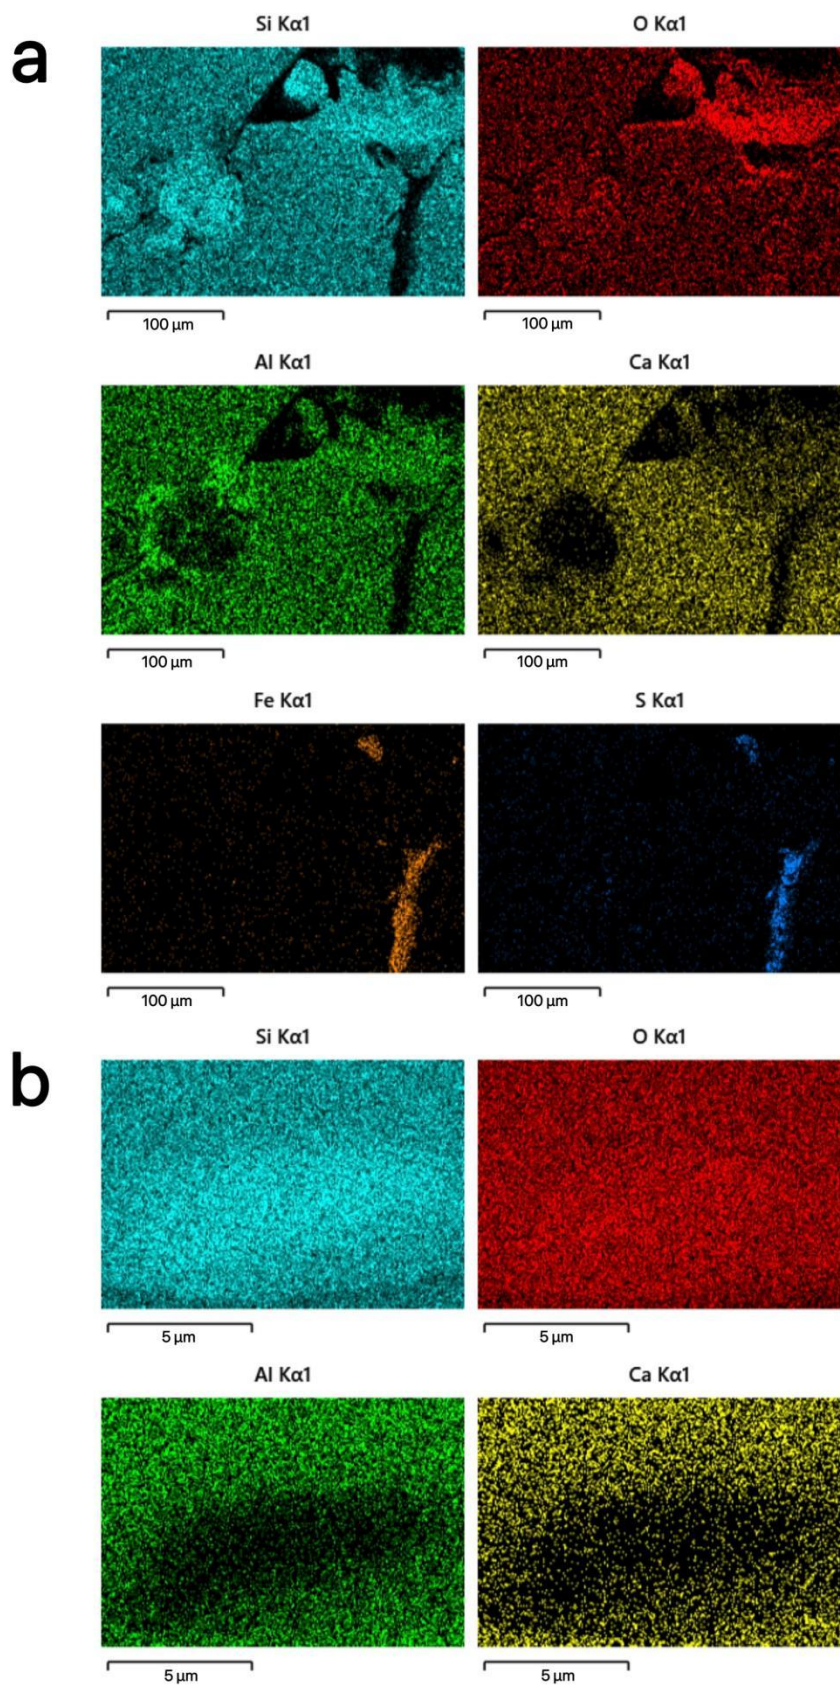

**Supplementary Fig. 9.** EDS elemental mapping of the cross-section of the matte ash-green glaze. The areas are shown in Figs. (a) 6f and (b) 6i.
